# Supplementary material for: The Mitosis and Neurodevelopment Proteins NDE1 and NDEL1 Form Dimers, Tetramers, and Polymers with a Folded Back Structure in Solution
Source: PubMed Central journal article supplement — J Biol Chem. 2012 Jul 27;287(39):32381–93. doi: 10.1074/jbc.M112.393439 (PMC3463352; doi:10.1074/jbc.m112.393439), 2012-07-27
Supplement: supp_M112.393439_jbc.M112.393439-1.pdf [file supp_M112.393439_jbc.M112.393439-1.pdf]

| Protein / Total cross-linked pairs | Oligomeric state | Total unambiguous cross-link pairs (including redundant pairs) | Unambiguous, non-redundant cross-link pairs unique to oligomeric state | Ambiguous pairs (cannot be assigned to NDE1 or NDEL1 alone from mixed NDE1-NDEL1 experiment) |
|------------------------------------|------------------|----------------------------------------------------------------|------------------------------------------------------------------------|----------------------------------------------------------------------------------------------|
| <b>NDE1 / 300</b>                  | Dimer            | 64                                                             | 27                                                                     | 13                                                                                           |
|                                    | Tetramer         | 99                                                             | 40                                                                     | 15                                                                                           |
|                                    | High MWt         | 137                                                            | 62                                                                     | 1                                                                                            |
| <b>NDEL1 / 75</b>                  | Dimer            | 23                                                             | 15                                                                     | -                                                                                            |
|                                    | Tetramer         | 34                                                             | 13                                                                     | 2                                                                                            |
|                                    | High MWt         | 18                                                             | 9                                                                      | 1                                                                                            |
| <b>NDE1-NDEL1 / 41</b>             | Dimer            | -                                                              | -                                                                      | -                                                                                            |
|                                    | Tetramer         | 6                                                              | 6                                                                      | 2                                                                                            |
|                                    | High MWt         | 35                                                             | 17                                                                     | 9                                                                                            |

**SUPPLEMENTAL TABLE 1: Breakdown of cross-linked peptide pairs per protein and oligomeric state.** The total number (416) cross-linked peptide pairs are shown broken-down for each respective protein, along with oligomeric state and total of non-redundant, unambiguous cross-linked pair. Note: for results obtained for the mixed NDE1-NDEL1 experiments, contacts that could be assigned unambiguously to one of the proteins (e.g. NDE1-NDE1 or NDEL1-NDEL1) were considered with the appropriate single protein experiment and merged with those data in this table. Refer Supplemental Table 2 for the raw data from all cross-linking/mass spectrometry experiments undertaken.
