# Supplementary material for: The Mitosis and Neurodevelopment Proteins NDE1 and NDEL1 Form Dimers, Tetramers, and Polymers with a Folded Back Structure in Solution
Source: PubMed Central journal article supplement — J Biol Chem. 2012 Jul 27;287(39):32381–93. doi: 10.1074/jbc.M112.393439 (PMC3463352; doi:10.1074/jbc.m112.393439), 2012-07-27
Supplement: supp_M112.393439_jbc.M112.393439-3.pdf [file supp_M112.393439_jbc.M112.393439-3.pdf]

Structural architecture of NDE1 and NDEL1 in solution

| Protein    | Oligomeric state | AA1         | AA2          | Minimum Ca to Ca distance in Å<br>(2V71; aa8–167)                  | Minimum Ca to Ca distance in Å<br>(2V66; aa58–168)                   | Replication status or equivalent residues in cross-linked contact                                                                |
|------------|------------------|-------------|--------------|--------------------------------------------------------------------|----------------------------------------------------------------------|----------------------------------------------------------------------------------------------------------------------------------|
| NDEL1      | Dimer            | K20         | K27          | 10.43 (intra)                                                      | n/a                                                                  | In NDEL1 tetramer                                                                                                                |
| NDEL1      | Dimer            | K25         | K27          | 5.43 (intra)                                                       | n/a                                                                  | In NDEL1 tetramer                                                                                                                |
| NDEL1      | Dimer            | K27         | K27          | 7.78 (inter)                                                       | n/a                                                                  |                                                                                                                                  |
| NDEL1      | Dimer            | K80         | K82          | 5.54 (intra)                                                       | n/a                                                                  | In NDEL1 tetramer, NDE1 dimer, NDE1 tetramer                                                                                     |
| NDEL1      | Dimer            | S90         | S95          | 8.21 (intra)                                                       | n/a                                                                  |                                                                                                                                  |
| NDEL1      | Dimer            | K108        | K108         | 13.92 (inter)                                                      | n/a                                                                  | In NDEL1 tetramer, NDE1 dimer, NDE1 tetramer                                                                                     |
| NDEL1      | Dimer            | K108        | Y114         | 9.77 (intra)                                                       | n/a                                                                  |                                                                                                                                  |
| NDEL1      | Tetramer         | K20         | K27          | 10.43 (intra)                                                      | n/a                                                                  | In NDEL1 dimer                                                                                                                   |
| NDEL1      | Tetramer         | K25         | K27          | 5.43 (intra)                                                       | n/a                                                                  | In NDEL1 dimer                                                                                                                   |
| NDEL1      | Tetramer         | K27         | S29          | 5.48 (intra)                                                       | n/a                                                                  |                                                                                                                                  |
| NDEL1      | Tetramer         | K80         | K82          | 5.54 (intra)                                                       | 5.35 (intra)                                                         | In NDEL1 dimer, NDE1 dimer, NDE1 tetramer                                                                                        |
| NDEL1      | Tetramer         | K80         | S90          | 15.15 (intra)                                                      | 15.15 (intra)                                                        |                                                                                                                                  |
| NDEL1      | Tetramer         | K108        | K108         | 13.92 (inter)                                                      | 12.91 (inter)                                                        | In NDEL1 dimer, NDE1 dimer, NDE1 tetramer                                                                                        |
| NDEL1      | Tetramer         | K108        | K113         | 8.86 (intra)                                                       | 8.62 (intra)                                                         | In NDE1 tetramer                                                                                                                 |
|            |                  |             |              | Minimum Ca to Ca distance in Å<br>(homology model; aa7–166)        | Minimum Ca to Ca distance in Å<br>(homology model; aa57–167)         |                                                                                                                                  |
| NDE1       | Dimer            | K79         | K81          | 5.36 (intra)                                                       | n/a                                                                  | In NDEL1 dimer, NDEL1 tetramer                                                                                                   |
| NDE1       | Dimer            | K81         | S94          | 20.01 (intra)                                                      | n/a                                                                  |                                                                                                                                  |
| NDE1       | Dimer            | K107        | K107         | 13.91 (inter)                                                      | n/a                                                                  | In NDEL1 dimer, NDEL1 tetramer                                                                                                   |
| NDE1       | Tetramer         | K79         | K81          | 5.36 (intra)                                                       | 5.30 (intra)                                                         | In NDE1 dimer, NDEL1 dimer, NDEL1 tetramer                                                                                       |
| NDE1       | Tetramer         | K81         | K107         | 36.17 (inter)                                                      | 36.15 (inter)                                                        |                                                                                                                                  |
| NDE1       | Tetramer         | K107        | K107         | 13.91 (inter)                                                      | 12.90 (inter)                                                        | In NDE1 dimer, NDEL1 dimer, NDEL1 tetramer                                                                                       |
| NDE1       | Tetramer         | K107        | K112         | 8.76 (intra)                                                       | 8.57 (intra)                                                         | In NDEL1 tetramer                                                                                                                |
|            |                  |             |              | Minimum Ca to Ca distance in Å<br>(homology model; aa7–166, 8-167) | Minimum Ca to Ca distance in Å<br>(homology model; aa57–167, 58-168) |                                                                                                                                  |
| NDE1-NDEL1 | Tetramer         | K107 (NDE1) | K108 (NDEL1) | 69.38 (inter protein)                                              | 68.03 (inter protein)                                                | While this contact is between two different proteins, the equivalent residues were seen in the pure NDEL1 dimer, NDEL1 tetramer, |

|  |  |  |  |  |  |                              |
|--|--|--|--|--|--|------------------------------|
|  |  |  |  |  |  | NDE1 dimer and NDE1 tetramer |
|--|--|--|--|--|--|------------------------------|

**SUPPLEMENTAL TABLE 3: Mapping cross-linking data on the crystal structures of NDEL1 and homology models of NDE1 and NDE1-NDEL1.**

Only cross-links that reside entirely within the region of the solved crystal structures (PDB IDs: 2V71 and 2V66) and the equivalent homology models of NDE1 and NDE1-NDEL1 are shown. Amino acids 8-167 were solved in the 2V71 crystal structure, while the shorter 2V66 structure contains amino acids 58-168. The 2V71 NDEL1 8-167 structure was deposited as a dimer in the PDB and a tetramer was generated as described previously using symmetry operations. The 2V66 NDEL1 58-168 structure was deposited as a tetramer. If a cross-link resided in a dimer, then each dimer was independently analyzed and all possible combinations of distances measured; only the lowest distance occurrence, either inter-chain or intra-chain is shown in the Table. In each case the oligomeric state, the specific amino acid residues involved (AA1 and AA2) in the cross-link peptides is provided. If a cross-link was noted in another oligomeric state or experiment, these are indicated in the 'Replication status' column. The distances were measured between the alpha Carbon atoms for a cross-linked pair of residues. Where self-residue cross-links occur, these are colored green indicating inter-chain contacts. The closest cross-link pairs seen in the NDEL1 dimer and tetramer, in the NDE1 dimer and tetramer, and in the NDE-NDEL1 tetramer that can be mapped on the longer crystal structure fragment (2V71) and the homology models are shown in Fig. 5 and 6 in the main text. Note, in some cases more than one mapped distance between residues is sufficiently close at the level of alpha Carbon atoms ( $< 27 \text{ \AA}$ ) to form feasible cross-links, but in this table only the closest cross-linked pair distances are provided for either the intra- or inter-chain linkage.
